# Supplementary material
Source: PubMed Central journal article supplement (PMC3150605)

## Supporting Information

### **Title:**

A Synthetic 7,8-Dihydroxyflavone Derivative Promotes Neurogenesis and Exhibits Potent Antidepressant Effect

### **Authors:**

Xia Liu, Chi-Bun Chan, Sung-Wuk Jang, Sompol Pradoldej, Junjian Huang, Kunyan He, Lien H. Phun, Stefan France, Ge Xiao, Yonghui Jia, Hongbo R. Luo and Keqiang Ye

### **Content:**

Supplemental Table 1

Supplemental Figure Legends

Supplemental Figure 1

Supplemental Figure 2

Supplemental Figure 3

Supplemental Figure 4

Supplemental Figure 5

**Supplemental Table 1. CBC analysis of TrkB agonists-treated mice**

| Parameter   | Control       | 7,8-DHF        | 4'-DMA-7,8-DHF    |
|-------------|---------------|----------------|-------------------|
| WBC (K/ul)  | 7.67±0.803    | 8.69±0.746     | 6.15±0.191        |
| NE (K/ul)   | 1.11±0.078    | 2.99±0.906     | 1.36±0.559        |
| LY (K/ul)   | 6.16±0.687    | 5.12±0.206     | 4.34±0.373        |
| MO (K/ul)   | 0.23±0.069    | 0.29±0.063     | 0.20±0.033        |
| EO (K/ul)   | 0.13±0.033    | 0.21±0.107     | 0.17±0.023        |
| BA (K/ul)   | 0.05±0.019    | 0.08±0.012     | 0.07±0.03         |
| RBC (K/ul)  | 7.87±0.886    | 8.43±0.393     | 8.47±0.28         |
| Hb (K/ul)   | 10.67±1.453   | 11.00±0.265    | 10.87±0.384       |
| HCT (K/ul)  | 39.07±4.431   | 40.13±2.019    | 40.90±1.724       |
| MCV (K/ul)  | 49.60±0.451   | 47.60±1.258    | 48.30±1.353       |
| MCH (K/ul)  | 13.47±0.384   | 13.10±0.321    | 12.83±0.12        |
| MCHC (K/ul) | 27.17±0.867   | 27.47±0.857    | 26.57±0.524       |
| RDW (K/ul)  | 18.83±0.639   | 19.53±0.754    | 18.73±0.273       |
| PLT (K/ul)  | 858.67±73.676 | 1113.00±22.234 | 1041.33±153.563 * |
| MPV (K/ul)  | 5.43±0.088    | 5.37±0.273     | 4.63±0.437        |

\* Although PLT is significantly different between control and drug treated group, they are in the normal range.

## **Supplemental Figure Legends**

### **Supplemental Figure 1. Structure-activity relationship study**

(A & B) Chemical structures of flavone derivatives. (C) Phospho-Akt ELISA assay. The lysates from cells, treated with various flavones or related compounds for 15 min, were analyzed with p-Akt ELISA. 7,8-dihydroxy groups are essential for the agonistic effect of 7,8-DHF.

### **Supplemental Figure 2. 4'-DMA-7,8-DHF is more potent than 7,8-DHF in triggering TrkB activation in primary neurons.**

Different concentrations of both compounds were employed to incubate with primary neurons for 15 min. The cell lysates were analyzed by immunoblotting with anti-p-TrkB 816 antibody.

### **Supplemental Figure 3. TrkB is activated by 7,8-DHF via oral administration in a dose dependent manner.**

Different doses of 7,8-DHF solutions were administrated to C57BL/6 mice via oral gavage. The mice were sacrificed 2 h after drug treatment, and the hippocampal region and spinal cord were homogenated and analyzed by immunoblotting with anti-p-TrkB.

### **Supplemental Figure 4. Histology examination of drug-treated mice and control saline-treated mice.**

The organs from drug-treated mice exhibited no demonstrable pathological changes compared with the vehicle-treated control mice.

### **Supplemental Figure 5. Cell growth and cytotoxicity assays**

(A & B) 3-(4,5-Dimethylthiazol-2-yl)-2,5-diphenyltetrazolium bromide (MTT) assay. Different concentrations of the compounds and control vehicle incubate with HEK293 cells in 6-well plates. The cell proliferation was analyzed by an MTT assay. Neither 4'-dimethylamino-7,8-dihydroxyflavone nor 7,8-dihydroxyflavone blocked HEK293 cell proliferation. (C & D) Lactate dehydrogenase (LDH) assay. Different concentrations of the compounds and control vehicle incubate with HEK293 cells in 6-well plates. The cell proliferation was monitored by an LDH assay. Neither 4'-dimethylamino-7,8-dihydroxyflavone nor 7,8-dihydroxyflavone demonstrated toxicity on HEK293 cells. (E & F) LDH assay. Different concentrations of the compounds and control vehicle were incubated with primary cortical neurons (DIV 7) in 6-well plates. The cellular toxicity was monitored by an LDH assay. Neither 4'-dimethylamino-7,8-dihydroxyflavone nor 7,8-dihydroxyflavone demonstrated toxicity on primary neurons at concentration up to 5  $\mu$ M.

Supplemental Figure 1a

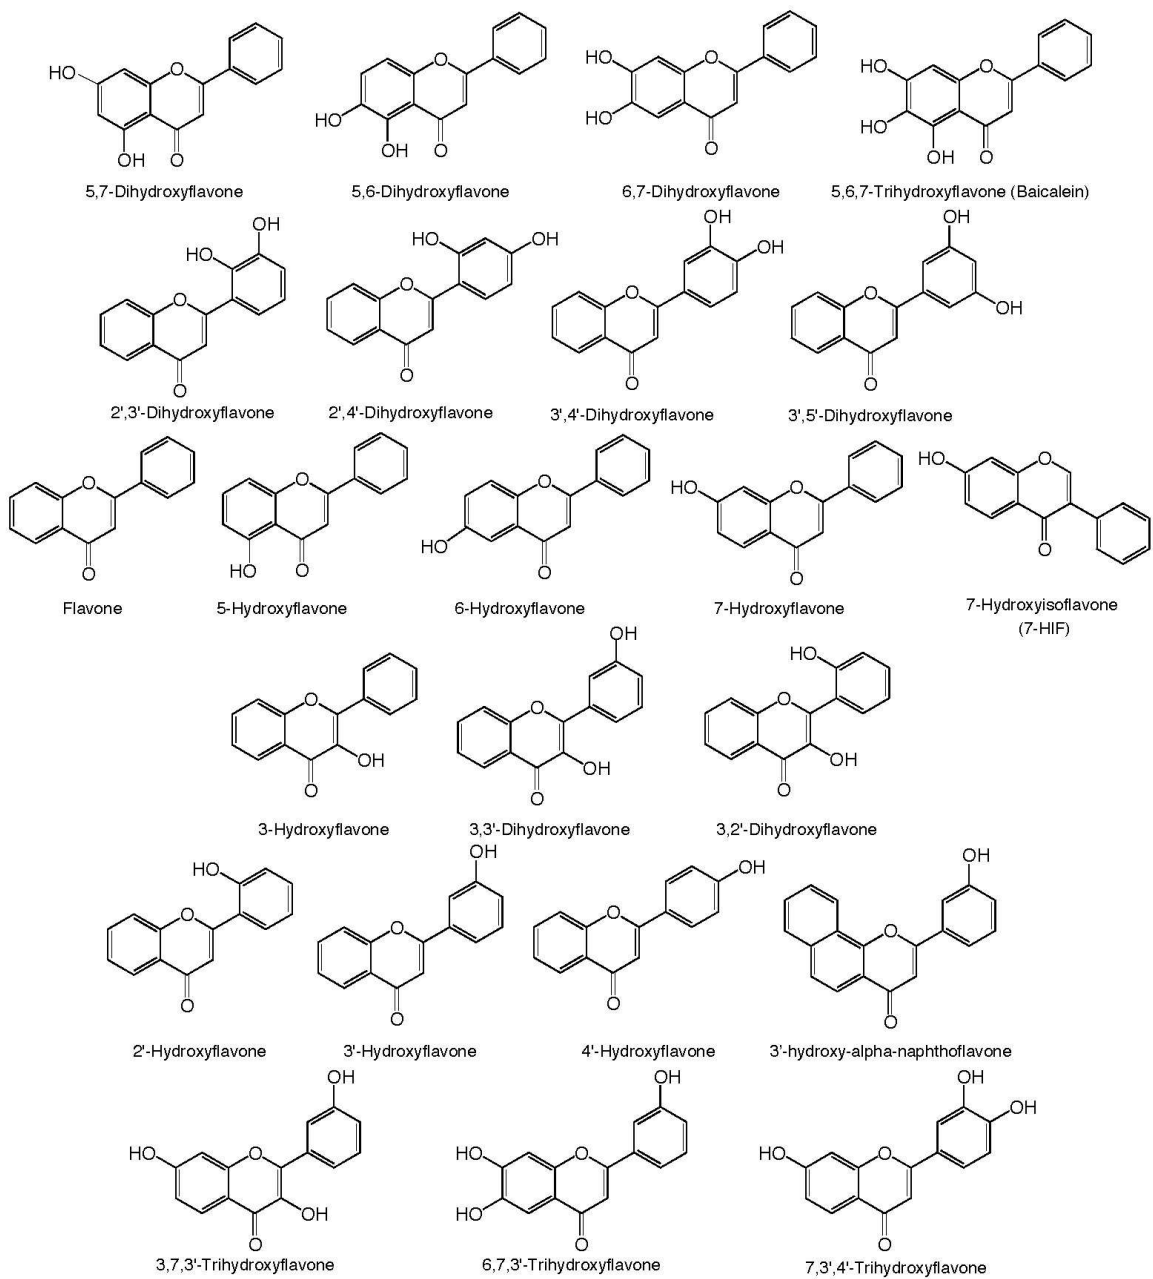

Supplemental Figure 1b

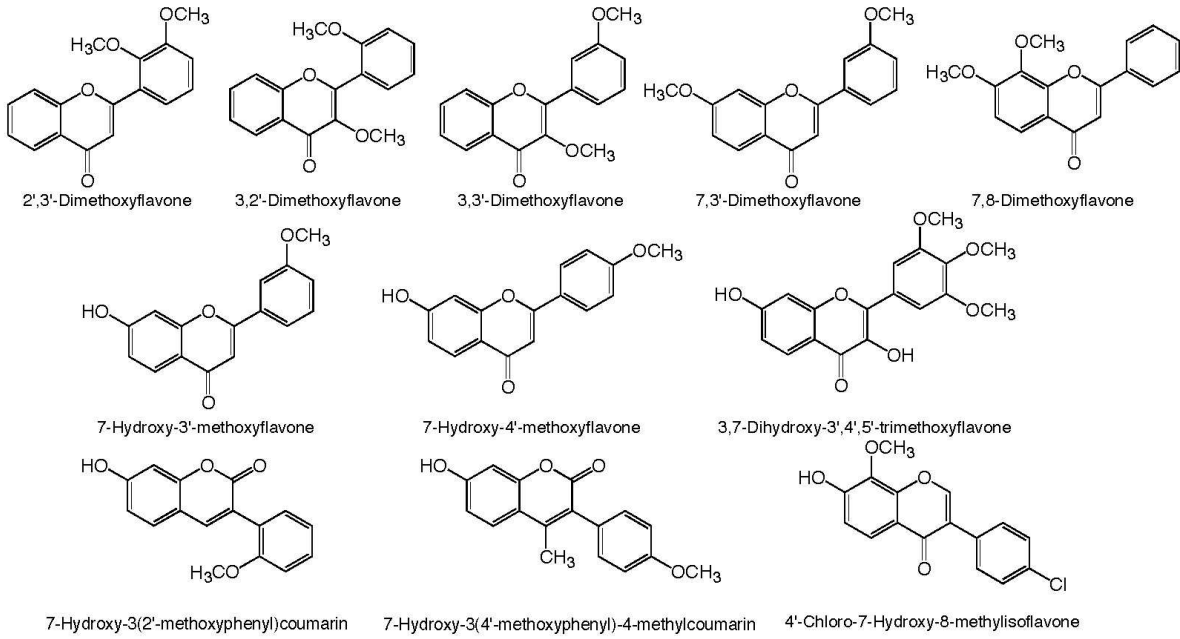

Supplemental Figure 1c

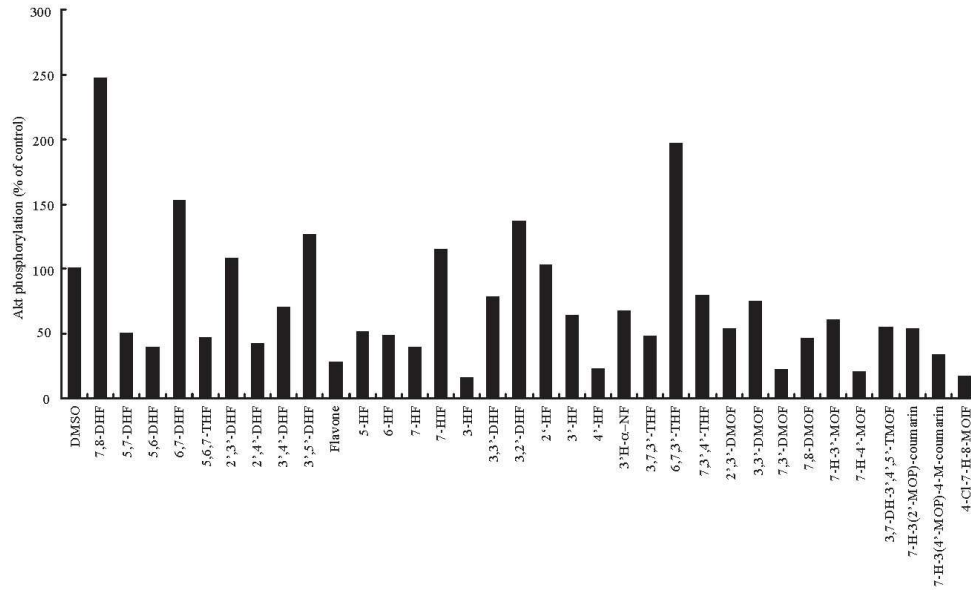

Supplemental Figure 2

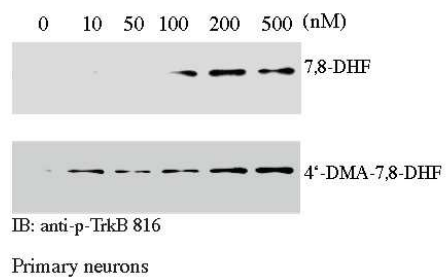

Supplemental Figure 3

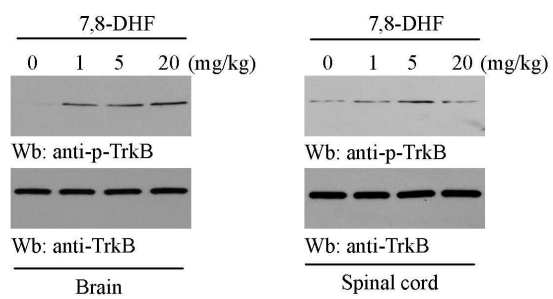



Supplemental Figure 4

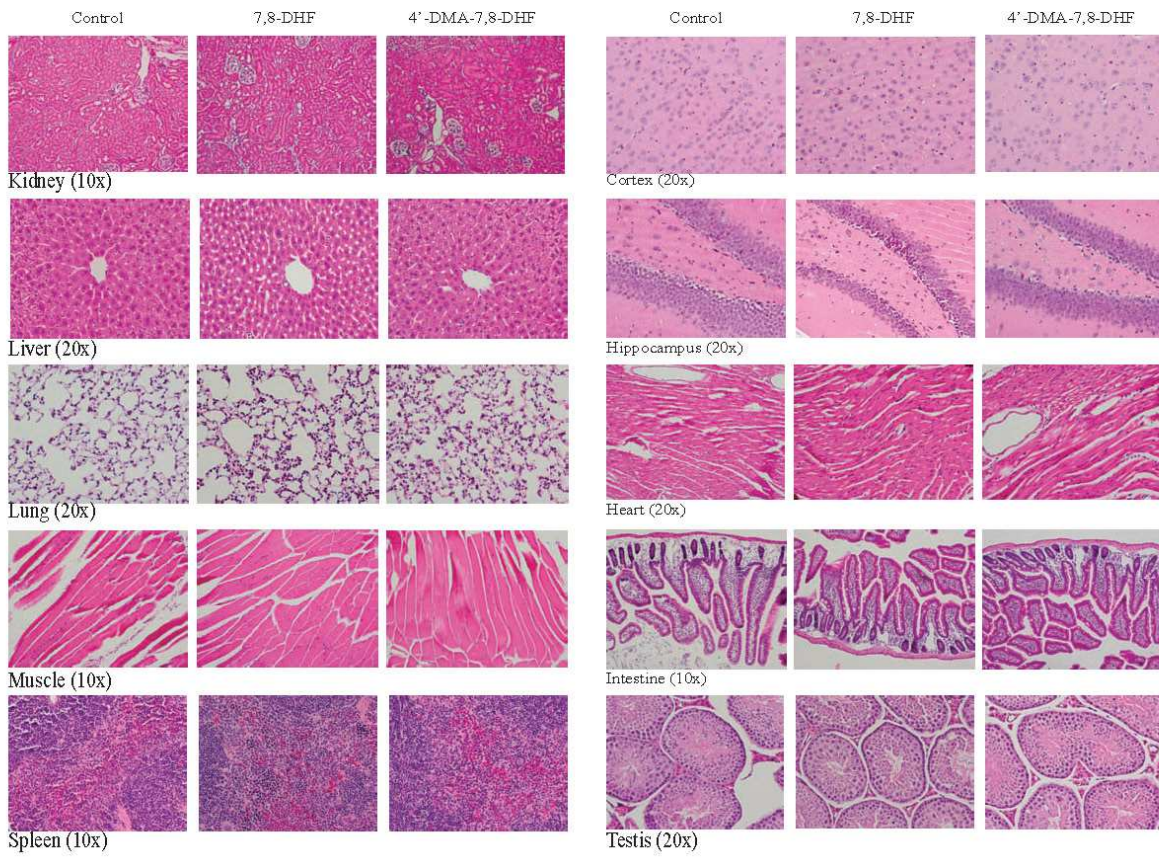

Supplemental Figure 5

**A**

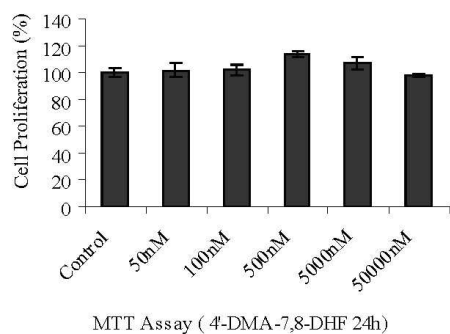

**B**

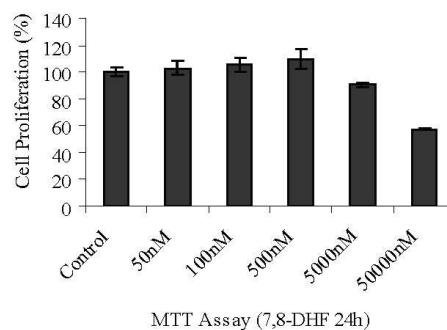

**C**

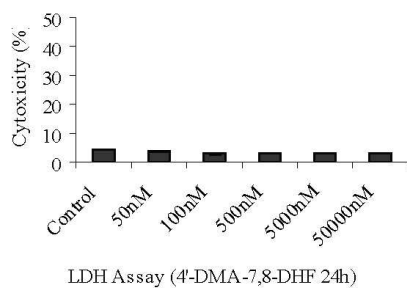

**D**

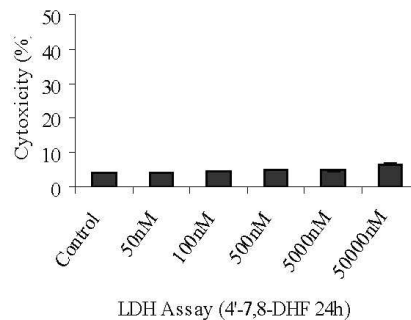

**E**

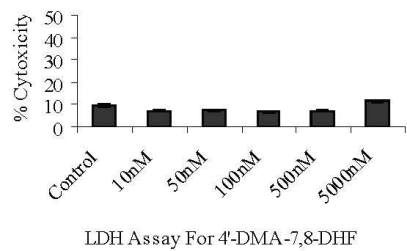

**F**

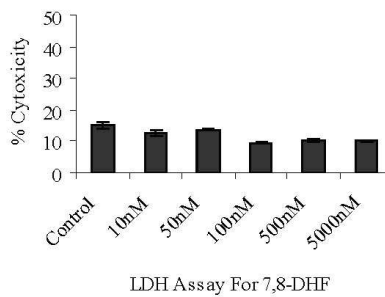

Supplement: NIHMS253216-supplement-1.pdf [file NIHMS253216-supplement-1.pdf]
